# Supplementary material for: Boron nitride microfiber reinforced polyacrylic acid hydrogels with excellent self-adhesion, fast pH response, and strain sensitivity
Source: Royal Society of Chemistry journal article supplement (doi:10.1039/d4sm00383g), 2024-01-01
Supplement: d4sm00383g1.pdf [file d4sm00383g1.pdf]

## Boron nitride microfiber reinforced polyacrylic acid hydrogels with excellent self-adhesion, fast pH response, and strain sensitivity

Xindi Huang,<sup>a,b</sup> Xiangqian Gao,<sup>\*a,b</sup> Jing Lin,<sup>a,b</sup> Chao Yu,<sup>a,b</sup> Chengchun Tang<sup>a,b</sup> and Yang

Huang<sup>\*a,b</sup>

<sup>a</sup> School of Materials Science and Engineering, Hebei University of Technology, Tianjin 300130, P. R. China

<sup>b</sup> Hebei Key Laboratory of Boron Nitride Micro and Nano Materials, Hebei University of Technology, Tianjin 300130, P. R. China

\* Corresponding author. E-mail: huangyang@hebut.edu.cn (Y.H.); 2681868012@qq.com

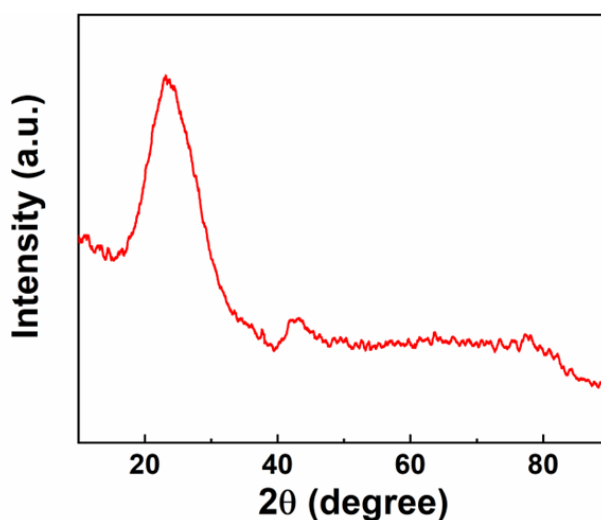

Fig. S1 XRD pattern of BNMFs,

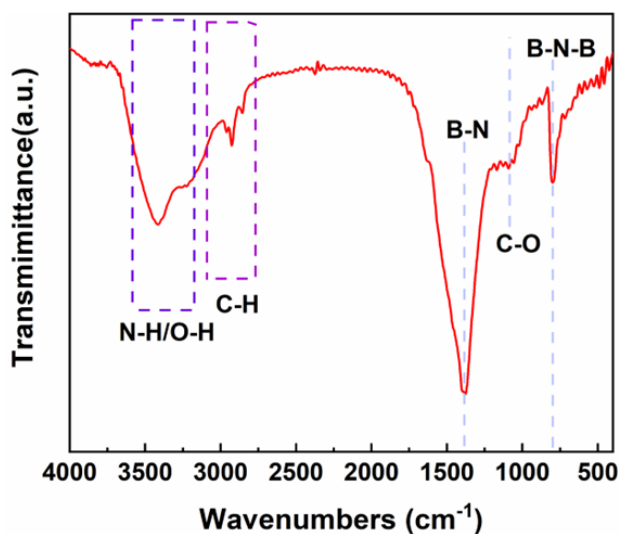

Fig. S2 FTIR spectrum of BNMFs,

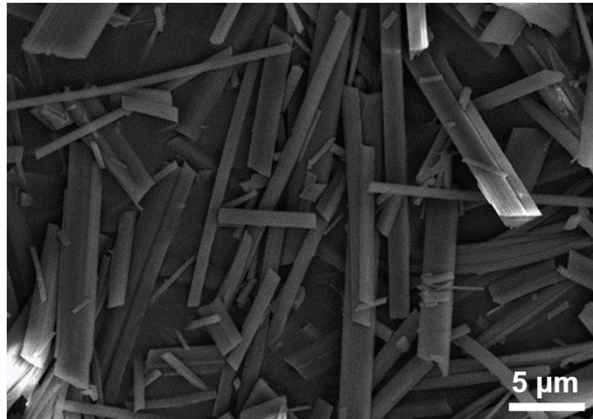

**Fig. S3** SEM image of BNMFs

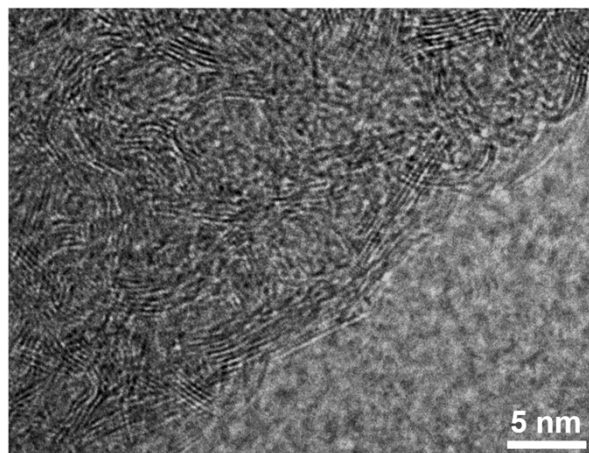

**Fig. S4** TEM image of BNMFs

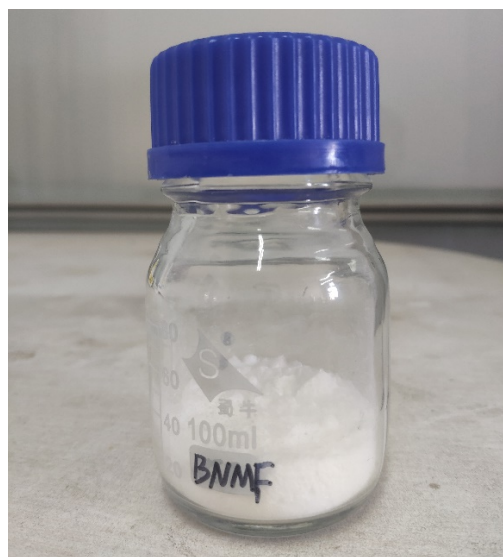

**Fig. S5** Optical photograph of BNMFs

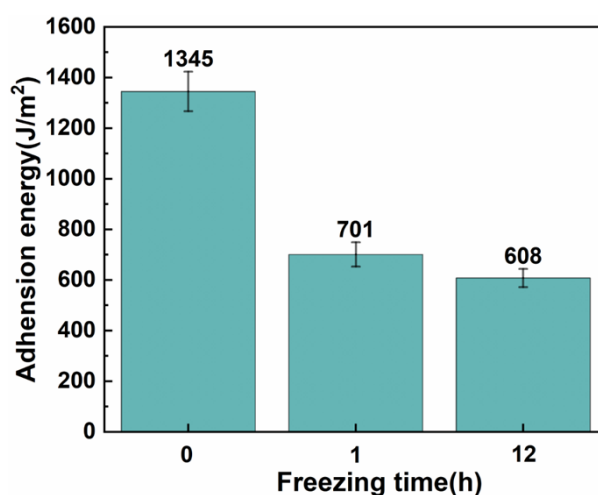

**Fig. S6** The adhesion energy of the composite hydrogels after undergoing freezing of 1 and 12 h at  $-20^{\circ}\text{C}$ .

**Table S1** Comparison of adhesive strength of the composite hydrogels with other similar hydrogels

| Hydrogels                               | Adhesive strength to pig skin (kPa) | Adhesive strength to iron (kPa) | refs      |
|-----------------------------------------|-------------------------------------|---------------------------------|-----------|
| TA@CNC/PAA/PAM hydrogel                 | 29.28                               | -                               | 1         |
| PDA/clay/PSBMA hydrogel                 | 22.3                                | -                               | 2         |
| TA@CNC/pectin/PAA hydrogel              | 168                                 | -                               | 3         |
| PAA/CNF-Gly hydrogel                    | -                                   | 23.3                            | 4         |
| Starch/PAA hydrogel                     | 46.51                               | -                               | 5         |
| Gelatin/PAA/ $\text{AlCl}_3^+$ hydrogel | 26.8                                | 12.6                            | 6         |
| SL/ $\text{Fe}^{3+}$ /PAA hydrogel      | 36.4                                | -                               | 7         |
| BNMFs/PAA hydrogel                      | 41.2                                | 222                             | This work |

## References

1. F. Han , X. Y. Xie , T. S. Wang , C. Y. Cao, J. J. Li , T. Y. Sun , H. Liu , S. M. Geng , Z. Wei , J. Li and F. Xu , *Adv. Healthcare Mater.*, 2023, **12** , 2201730 .
2. X. J. Pei , H. Zhang , Y. Zhou , L. J. Zhou and J. Fu , *Mater. Horiz.*, 2020, **7** , 1872-1882 .
3. Y. X. Chao , H. C. Gao , X. Zhu , H. B. Wang , Z. H. Yang , W. Y. Zhou , Y. Z. Li , H. W. Chen , Y. Yang and Y. Hu , *Ind. Crop. Prod.*, 2022, **187** , 115272 .
4. X. Q. Zhan , Q. Fu , Z. Q. Ran , H. Chen , N. Ma and F. C. Tsai , *Appl. Mater. Today*, 2023, **31** , 101777 .
5. Y. H. Zhou , X. Fei , J. Tian , L. Q. Xu and Y. Li , *Int. J. Biol. Macromol.*, 2022, **222** , 1211-

1220 .

6. Z. R. He , and W. Z. Yuan , *ACS Appl. Mater. Interfaces*, 2021, **13** , 1474-1485 .

7. Q. H. Wang , X. F. Pan , C. M. Lin , X. J. Ma , S. L. Cao and Y. H. Ni , *Chem. Eng. J.*, 2020, **396** , 125341 .
